# Supplementary material for: muBLASTP: database-indexed protein sequence search on multicore CPUs
Source: PubMed Central journal article supplement (PMC5096327; doi:10.1186/s12859-016-1302-4), 2016-11-04
Supplement: 12859_2016_1302_MOESM1_ESM.pdf [file 12859_2016_1302_MOESM1_ESM.pdf]

# muBLASTP: Database-Indexed Protein Sequence Search on Multicore CPUs — Additional File

Jing Zhang\*, Sanchit Misra, Hao Wang and Wu-chun Feng

**Table 1 Queries of length 100 for uniprot\_sprot database**

| Id | Accession No. | Length | Id  | Accession No. | Length |
|----|---------------|--------|-----|---------------|--------|
| 1  | Q91G65        | 100    | 51  | P24301        | 100    |
| 2  | Q66125        | 100    | 52  | B2HD09        | 100    |
| 3  | P80353        | 100    | 53  | P60533        | 100    |
| 4  | O60516        | 100    | 54  | A0QSS3        | 100    |
| 5  | P20194        | 100    | 55  | A5U893        | 100    |
| 6  | P12820        | 100    | 56  | P9WPE4        | 100    |
| 7  | Q72CU1        | 100    | 57  | P9WPE5        | 100    |
| 8  | A1VEL6        | 100    | 58  | A0PME8        | 100    |
| 9  | Q5YS19        | 100    | 59  | A1T576        | 100    |
| 10 | A5GM25        | 100    | 60  | Q5Z1G0        | 100    |
| 11 | P81644        | 100    | 61  | Q9XCB0        | 100    |
| 12 | E2RAK7        | 100    | 62  | P08929        | 100    |
| 13 | P0DJG2        | 100    | 63  | P37854        | 100    |
| 14 | P02652        | 100    | 64  | P37852        | 100    |
| 15 | P0DM93        | 100    | 65  | P07231        | 100    |
| 16 | P18656        | 100    | 66  | A4QGR5        | 100    |
| 17 | P0DM94        | 100    | 67  | Q8NMQ1        | 100    |
| 18 | P0DM95        | 100    | 68  | B8DJU4        | 100    |
| 19 | P0DM96        | 100    | 69  | Q5F9I5        | 100    |
| 20 | Q8MIQ5        | 100    | 70  | Q9JZZ5        | 100    |
| 21 | P27916        | 100    | 71  | P0C8B3        | 100    |
| 22 | P0DMN9        | 100    | 72  | Q9BXV9        | 100    |
| 23 | P12279        | 100    | 73  | P0C8B5        | 100    |
| 24 | P0DMP9        | 100    | 74  | Q6UWE3        | 100    |
| 25 | Q7Z4Y8        | 100    | 75  | Q2XXR4        | 100    |
| 26 | O66564        | 100    | 76  | Q556L8        | 100    |
| 27 | A7ZC73        | 100    | 77  | P10889        | 100    |
| 28 | A7GX83        | 100    | 78  | P30348        | 100    |
| 29 | A0RQF4        | 100    | 79  | Q6W5C0        | 100    |
| 30 | P0C6P0        | 100    | 80  | A9QWQ1        | 100    |
| 31 | Q6FY24        | 100    | 81  | Q9JHH5        | 100    |
| 32 | P84291        | 100    | 82  | P29669        | 100    |
| 33 | P00974        | 100    | 83  | P00087        | 100    |
| 34 | P04815        | 100    | 84  | Q89AA6        | 100    |
| 35 | P33719        | 100    | 85  | P64387        | 100    |
| 36 | Q8YQ90        | 100    | 86  | Q9Z8C7        | 100    |
| 37 | P0CE67        | 100    | 87  | P64386        | 100    |
| 38 | Q5RHZ2        | 100    | 88  | P73418        | 100    |
| 39 | Q9TTQ4        | 100    | 89  | Q01524        | 100    |
| 40 | P72759        | 100    | 90  | Q5G860        | 100    |
| 41 | Q06153        | 100    | 91  | P0C8A8        | 100    |
| 42 | A8YXZ5        | 100    | 92  | Q2V4J8        | 100    |
| 43 | Q8N0T1        | 100    | 93  | Q89681        | 100    |
| 44 | A0QKR3        | 100    | 94  | P0C232        | 100    |
| 45 | P60532        | 100    | 95  | P11547        | 100    |
| 46 | P15020        | 100    | 96  | Q751F9        | 100    |
| 47 | A1KPA9        | 100    | 97  | P40932        | 100    |
| 48 | C1AHN1        | 100    | 98  | B3MQ24        | 100    |
| 49 | A4TEN7        | 100    | 99  | B4H2S0        | 100    |
| 50 | B8ZUD1        | 100    | 100 | Q29IN4        | 100    |

**Table 2 Queries of length 500 for uniprot\_sprot database**

| Id | Accession No. | Length | Id  | Accession No. | Length |
|----|---------------|--------|-----|---------------|--------|
| 1  | Q28647        | 500    | 51  | Q73IU2        | 500    |
| 2  | Q93YV6        | 500    | 52  | Q3IP82        | 500    |
| 3  | P24758        | 500    | 53  | P32629        | 500    |
| 4  | A2Z212        | 500    | 54  | B7GGW0        | 500    |
| 5  | Q0J185        | 500    | 55  | B3PD57        | 500    |
| 6  | Q92455        | 500    | 56  | A8ALP0        | 500    |
| 7  | P12390        | 500    | 57  | A7ZHF3        | 500    |
| 8  | Q9UW95        | 500    | 58  | B7UIA8        | 500    |
| 9  | Q3Z7F6        | 500    | 59  | B7MAI5        | 500    |
| 10 | P15437        | 500    | 60  | B7L4I3        | 500    |
| 11 | P86886        | 500    | 61  | P58538        | 500    |
| 12 | P12762        | 500    | 62  | B5YZ98        | 500    |
| 13 | P81178        | 500    | 63  | B7NHG8        | 500    |
| 14 | P54115        | 500    | 64  | B7MNR9        | 500    |
| 15 | O74187        | 500    | 65  | B7M0F7        | 500    |
| 16 | Q7ZW24        | 500    | 66  | C4ZPY5        | 500    |
| 17 | Q8EI85        | 500    | 67  | A7ZW12        | 500    |
| 18 | B7J519        | 500    | 68  | A1A7A9        | 500    |
| 19 | B5EKZ2        | 500    | 69  | Q0TLS8        | 500    |
| 20 | A6TWW9        | 500    | 70  | Q8FL89        | 500    |
| 21 | Q5NXM1        | 500    | 71  | B1IRB6        | 500    |
| 22 | A1K9L5        | 500    | 72  | P08202        | 500    |
| 23 | O32106        | 500    | 73  | B7N7T6        | 500    |
| 24 | Q1LTH8        | 500    | 74  | B6HZ42        | 500    |
| 25 | Q6MH10        | 500    | 75  | B1LFZ6        | 500    |
| 26 | Q5L681        | 500    | 76  | Q1RGD7        | 500    |
| 27 | Q254B9        | 500    | 77  | A4W6G6        | 500    |
| 28 | Q6NG90        | 500    | 78  | B7LVT3        | 500    |
| 29 | Q8NNJ4        | 500    | 79  | B5Y1Y1        | 500    |
| 30 | Q5FFZ5        | 500    | 80  | A6T4K0        | 500    |
| 31 | Q5HAP2        | 500    | 81  | Q1IUW9        | 500    |
| 32 | Q1QKW6        | 500    | 82  | Q21MP3        | 500    |
| 33 | Q3SS04        | 500    | 83  | B5F783        | 500    |
| 34 | B6JGL8        | 500    | 84  | A9MQF1        | 500    |
| 35 | Q2IX74        | 500    | 85  | Q57TF9        | 500    |
| 36 | Q6N5B9        | 500    | 86  | B5FI45        | 500    |
| 37 | Q135P8        | 500    | 87  | B5R1T9        | 500    |
| 38 | B3Q9R8        | 500    | 88  | B5RGD3        | 500    |
| 39 | C3PMI0        | 500    | 89  | B4TJ59        | 500    |
| 40 | A8EXL1        | 500    | 90  | B4SU23        | 500    |
| 41 | Q92J85        | 500    | 91  | Q5PDF2        | 500    |
| 42 | Q4UKD7        | 500    | 92  | A9MYN8        | 500    |
| 43 | A8F0Q0        | 500    | 93  | B5BL43        | 500    |
| 44 | P27888        | 500    | 94  | B4TWU8        | 500    |
| 45 | C4K1N6        | 500    | 95  | P58539        | 500    |
| 46 | B0BWB2        | 500    | 96  | P06189        | 500    |
| 47 | A8GQW7        | 500    | 97  | B8EEN5        | 500    |
| 48 | Q68XM6        | 500    | 98  | A0KWX7        | 500    |
| 49 | Q21KZ5        | 500    | 99  | Q0HIR5        | 500    |
| 50 | C4LA51        | 500    | 100 | Q0HV71        | 500    |

\*Correspondence: zjing14@vt.edu

**Table 3** Queries of length 1000 for uniprot\_sprot database

| Id | Accession No. | Length | Id  | Accession No. | Length |
|----|---------------|--------|-----|---------------|--------|
| 1  | C8V212        | 1000   | 51  | Q6NU21        | 1001   |
| 2  | Q86YS7        | 1000   | 52  | Q7ZYJ0        | 1001   |
| 3  | Q5RDC8        | 1000   | 53  | Q7L7X3        | 1001   |
| 4  | P27895        | 1000   | 54  | Q5F2E8        | 1001   |
| 5  | Q1ZXJ0        | 1000   | 55  | O88664        | 1001   |
| 6  | Q20168        | 1000   | 56  | Q13472        | 1001   |
| 7  | Q6NU40        | 1000   | 57  | A3PWJ3        | 1001   |
| 8  | Q8C4S8        | 1000   | 58  | Q9Y824        | 1001   |
| 9  | Q81ZW1        | 1000   | 59  | Q8CFW1        | 1002   |
| 10 | Q9W1M8        | 1000   | 60  | Q292Q0        | 1002   |
| 11 | Q9Y802        | 1000   | 61  | Q9M2Z1        | 1002   |
| 12 | Q6CPV1        | 1000   | 62  | Q8CJB9        | 1002   |
| 13 | O74945        | 1000   | 63  | O13849        | 1002   |
| 14 | Q9Y6Y8        | 1000   | 64  | Q96JQ2        | 1002   |
| 15 | Q86DA5        | 1000   | 65  | Q07497        | 1002   |
| 16 | Q6CIT4        | 1000   | 66  | Q3TYG6        | 1002   |
| 17 | P34619        | 1000   | 67  | Q08379        | 1002   |
| 18 | B4MR46        | 1000   | 68  | Q91VB4        | 1002   |
| 19 | Q5ZKA2        | 1000   | 69  | Q5ZLK7        | 1002   |
| 20 | Q6BL58        | 1000   | 70  | P39730        | 1002   |
| 21 | Q55445        | 1000   | 71  | Q71S21        | 1002   |
| 22 | Q52149        | 1000   | 72  | A2YQ56        | 1002   |
| 23 | Q9FCI4        | 1000   | 73  | Q69UZ3        | 1002   |
| 24 | Q8N283        | 1001   | 74  | Q8VDG6        | 1002   |
| 25 | O14983        | 1001   | 75  | A1A278        | 1002   |
| 26 | P04191        | 1001   | 76  | P65373        | 1002   |
| 27 | O75150        | 1001   | 77  | P9WJU0        | 1002   |
| 28 | Q4R7K7        | 1001   | 78  | P9WJU1        | 1002   |
| 29 | Q3U319        | 1001   | 79  | Q6CQX2        | 1002   |
| 30 | Q5RAU7        | 1001   | 80  | Q8VHN2        | 1002   |
| 31 | Q7V9U4        | 1001   | 81  | P31630        | 1002   |
| 32 | Q8NEM8        | 1001   | 82  | Q8L6J5        | 1002   |
| 33 | Q8VHK9        | 1001   | 83  | Q93Y94        | 1002   |
| 34 | Q9S7J8        | 1001   | 84  | P59158        | 1002   |
| 35 | Q01W31        | 1001   | 85  | P55018        | 1002   |
| 36 | P72689        | 1001   | 86  | P43612        | 1002   |
| 37 | Q9ZJ57        | 1001   | 87  | Q8GYD9        | 1002   |
| 38 | A6WXF0        | 1001   | 88  | Q95WA4        | 1002   |
| 39 | Q0TR53        | 1001   | 89  | P48526        | 1002   |
| 40 | Q8XL08        | 1001   | 90  | Q89DF8        | 1002   |
| 41 | Q64M78        | 1001   | 91  | A5F398        | 1002   |
| 42 | Q94526        | 1001   | 92  | P0C6Q7        | 1002   |
| 43 | Q9JMC1        | 1001   | 93  | Q00037        | 1002   |
| 44 | Q9MAT0        | 1001   | 94  | Q8JYK0        | 1002   |
| 45 | P80560        | 1001   | 95  | Q24314        | 1002   |
| 46 | Q8IXT5        | 1001   | 96  | P58612        | 1002   |
| 47 | F4IV66        | 1001   | 97  | P93820        | 1002   |
| 48 | Q9R0X5        | 1001   | 98  | A1T636        | 1002   |
| 49 | Q08162        | 1001   | 99  | P25992        | 1002   |
| 50 | Q2VVA4        | 1001   | 100 | Q9NQ90        | 1003   |

**Table 4** Queries of mixed length for uniprot\_sprot database

| Id | Accession No. | Length | Id  | Accession No. | Length |
|----|---------------|--------|-----|---------------|--------|
| 1  | A6MMM5        | 31     | 51  | Q8ZLJ4        | 292    |
| 2  | P82707        | 46     | 52  | P16286        | 297    |
| 3  | P24780        | 60     | 53  | Q6PBN2        | 303    |
| 4  | Q0ZIZ9        | 66     | 54  | Q2IW81        | 308    |
| 5  | Q2V329        | 73     | 55  | A2RC40        | 312    |
| 6  | A4YT76        | 79     | 56  | Q1GZG8        | 317    |
| 7  | B7N0H8        | 85     | 57  | P33412        | 323    |
| 8  | H1ZZI2        | 89     | 58  | C1KWW2        | 329    |
| 9  | Q7V9Y9        | 94     | 59  | Q7VKV5        | 334    |
| 10 | P66733        | 99     | 60  | C0R200        | 339    |
| 11 | B3EGY8        | 103    | 61  | B5XZ47        | 344    |
| 12 | A7I5P8        | 108    | 62  | P62723        | 349    |
| 13 | A4II29        | 114    | 63  | Q62AI9        | 355    |
| 14 | Q31T86        | 119    | 64  | B7UQ99        | 360    |
| 15 | B2V4E9        | 122    | 65  | Q29423        | 366    |
| 16 | B8F4P3        | 127    | 66  | P23441        | 372    |
| 17 | A0QHC1        | 131    | 67  | C0Q071        | 379    |
| 18 | B1X6G5        | 136    | 68  | B8CW61        | 384    |
| 19 | Q2G214        | 141    | 69  | A2XSL4        | 391    |
| 20 | Q58T60        | 145    | 70  | P9WMU8        | 397    |
| 21 | Q7MN57        | 149    | 71  | Q6AX53        | 405    |
| 22 | Q3YUA7        | 153    | 72  | P9WJX6        | 413    |
| 23 | Q5FZ16        | 156    | 73  | Q54HY8        | 421    |
| 24 | Q2SMN6        | 160    | 74  | Q88QT4        | 427    |
| 25 | P0A4C9        | 165    | 75  | Q9Z2I8        | 433    |
| 26 | Q32D37        | 171    | 76  | O61764        | 441    |
| 27 | O98693        | 176    | 77  | Q8ZN58        | 449    |
| 28 | P16741        | 180    | 78  | Q3TJD7        | 457    |
| 29 | Q8YHM8        | 185    | 79  | P0C1Z2        | 466    |
| 30 | Q6ZR85        | 190    | 80  | A8AJE9        | 474    |
| 31 | P32459        | 195    | 81  | A1WVR7        | 484    |
| 32 | Q0II41        | 199    | 82  | Q07XN9        | 493    |
| 33 | Q9CIS2        | 203    | 83  | Q7NA81        | 503    |
| 34 | P53655        | 207    | 84  | B9E8Y0        | 513    |
| 35 | Q5M3V0        | 211    | 85  | A3D7J9        | 526    |
| 36 | Q9M0L0        | 216    | 86  | P38137        | 543    |
| 37 | B2I9J1        | 220    | 87  | A0LE49        | 556    |
| 38 | P24473        | 226    | 88  | A9WP05        | 573    |
| 39 | A4SY42        | 230    | 89  | Q8BZ64        | 593    |
| 40 | Q83IW8        | 235    | 90  | Q1HVF2        | 613    |
| 41 | Q3BVV3        | 240    | 91  | A0Q762        | 634    |
| 42 | Q971Z6        | 245    | 92  | Q7VLX8        | 659    |
| 43 | Q87LD3        | 250    | 93  | Q328L9        | 689    |
| 44 | Q0AP84        | 255    | 94  | Q5MZ99        | 720    |
| 45 | A1KTD5        | 259    | 95  | Q9SJE1        | 760    |
| 46 | B1HTF0        | 265    | 96  | Q15MZ1        | 811    |
| 47 | A7GTW1        | 270    | 97  | Q2P497        | 869    |
| 48 | B4EBE8        | 275    | 98  | Q9QWG5        | 928    |
| 49 | Q6KIS8        | 281    | 99  | P18907        | 1021   |
| 50 | O28147        | 286    | 100 | A9BF33        | 1187   |

**Table 5** Queries of length 100 for env\_nr database

| Id | Accession No. | Length | Id  | Accession No. | Length |
|----|---------------|--------|-----|---------------|--------|
| 1  | 139615335     | 100    | 51  | 140413579     | 100    |
| 2  | 140316088     | 100    | 52  | 140006960     | 100    |
| 3  | 136940263     | 100    | 53  | 136945600     | 100    |
| 4  | 138510479     | 100    | 54  | 141026926     | 100    |
| 5  | 142508111     | 100    | 55  | 141490456     | 100    |
| 6  | 140638036     | 100    | 56  | 139000825     | 100    |
| 7  | 142569616     | 100    | 57  | 136948961     | 100    |
| 8  | 141804023     | 100    | 58  | 143265442     | 100    |
| 9  | 138785064     | 100    | 59  | 139877500     | 100    |
| 10 | 140767667     | 100    | 60  | 141803743     | 100    |
| 11 | 136921591     | 100    | 61  | 139623376     | 100    |
| 12 | 136927268     | 100    | 62  | 141069362     | 100    |
| 13 | 139621791     | 100    | 63  | 136961885     | 100    |
| 14 | 138372699     | 100    | 64  | 139750866     | 100    |
| 15 | 134399509     | 100    | 65  | 139093402     | 100    |
| 16 | 141196730     | 100    | 66  | 141027510     | 100    |
| 17 | 140007157     | 100    | 67  | 136965080     | 100    |
| 18 | 136944069     | 100    | 68  | 139132992     | 100    |
| 19 | 141804713     | 100    | 69  | 136964010     | 100    |
| 20 | 139621221     | 100    | 70  | 139625382     | 100    |
| 21 | 139876961     | 100    | 71  | 136981495     | 100    |
| 22 | 140004365     | 100    | 72  | 138374001     | 100    |
| 23 | 136927121     | 100    | 73  | 139345961     | 100    |
| 24 | 141344156     | 100    | 74  | 136973806     | 100    |
| 25 | 140765041     | 100    | 75  | 136972421     | 100    |
| 26 | 136928547     | 100    | 76  | 141198679     | 100    |
| 27 | 136959850     | 100    | 77  | 141497533     | 100    |
| 28 | 139129699     | 100    | 78  | 139341871     | 100    |
| 29 | 139000286     | 100    | 79  | 141501333     | 100    |
| 30 | 140004922     | 100    | 80  | 142532101     | 100    |
| 31 | 140639049     | 100    | 81  | 142646847     | 100    |
| 32 | 136927474     | 100    | 82  | 140900797     | 100    |
| 33 | 139878225     | 100    | 83  | 141030396     | 100    |
| 34 | 140639916     | 100    | 84  | 141071346     | 100    |
| 35 | 142509299     | 100    | 85  | 139753011     | 100    |
| 36 | 139131239     | 100    | 86  | 138787255     | 100    |
| 37 | 138371510     | 100    | 87  | 136986363     | 100    |
| 38 | 134419309     | 100    | 88  | 140640342     | 100    |
| 39 | 141026311     | 100    | 89  | 134406224     | 100    |
| 40 | 139749537     | 100    | 90  | 139496456     | 100    |
| 41 | 136946039     | 100    | 91  | 139347039     | 100    |
| 42 | 136933491     | 100    | 92  | 140769682     | 100    |
| 43 | 138785104     | 100    | 93  | 138640754     | 100    |
| 44 | 136950057     | 100    | 94  | 139345195     | 100    |
| 45 | 142657699     | 100    | 95  | 136969768     | 100    |
| 46 | 138636536     | 100    | 96  | 138512421     | 100    |
| 47 | 140280422     | 100    | 97  | 138199023     | 100    |
| 48 | 138639003     | 100    | 98  | 139880183     | 100    |
| 49 | 142791972     | 100    | 99  | 139495726     | 100    |
| 50 | 139335852     | 100    | 100 | 139753060     | 100    |

**Table 6** Queries of length 500 for env\_nr database

| Id | Accession No. | Length | Id  | Accession No. | Length |
|----|---------------|--------|-----|---------------|--------|
| 1  | 142805765     | 500    | 51  | 134788806     | 500    |
| 2  | 142744135     | 500    | 52  | 134791201     | 500    |
| 3  | 142693496     | 500    | 53  | 134784848     | 500    |
| 4  | 142793908     | 500    | 54  | 134804657     | 500    |
| 5  | 142660330     | 500    | 55  | 134804487     | 500    |
| 6  | 142818278     | 500    | 56  | 134853787     | 500    |
| 7  | 142040007     | 500    | 57  | 134861980     | 500    |
| 8  | 142048558     | 500    | 58  | 134870882     | 500    |
| 9  | 142537862     | 500    | 59  | 134881167     | 500    |
| 10 | 142044179     | 500    | 60  | 134875723     | 500    |
| 11 | 142754900     | 500    | 61  | 134877419     | 500    |
| 12 | 134329765     | 500    | 62  | 134881904     | 500    |
| 13 | 134329514     | 500    | 63  | 134889746     | 500    |
| 14 | 134331440     | 500    | 64  | 134892438     | 500    |
| 15 | 134340658     | 500    | 65  | 134888404     | 500    |
| 16 | 134342535     | 500    | 66  | 134900152     | 500    |
| 17 | 134345888     | 500    | 67  | 134899016     | 500    |
| 18 | 134360818     | 500    | 68  | 134901416     | 500    |
| 19 | 134361200     | 500    | 69  | 134902491     | 500    |
| 20 | 134362380     | 500    | 70  | 134920830     | 500    |
| 21 | 134364194     | 500    | 71  | 134922117     | 500    |
| 22 | 134364273     | 500    | 72  | 134933345     | 500    |
| 23 | 134366729     | 500    | 73  | 134930065     | 500    |
| 24 | 134367577     | 500    | 74  | 134924455     | 500    |
| 25 | 134367701     | 500    | 75  | 134932589     | 500    |
| 26 | 134375858     | 500    | 76  | 134933381     | 500    |
| 27 | 134382087     | 500    | 77  | 134938870     | 500    |
| 28 | 134382452     | 500    | 78  | 134946326     | 500    |
| 29 | 134382639     | 500    | 79  | 134948349     | 500    |
| 30 | 134383562     | 500    | 80  | 134949502     | 500    |
| 31 | 134389677     | 500    | 81  | 134945165     | 500    |
| 32 | 134411863     | 500    | 82  | 134956240     | 500    |
| 33 | 134492867     | 500    | 83  | 134961862     | 500    |
| 34 | 134495571     | 500    | 84  | 134958689     | 500    |
| 35 | 134494641     | 500    | 85  | 134964908     | 500    |
| 36 | 134559117     | 500    | 86  | 134966928     | 500    |
| 37 | 134557102     | 500    | 87  | 134967552     | 500    |
| 38 | 134578936     | 500    | 88  | 134968891     | 500    |
| 39 | 134633606     | 500    | 89  | 134977906     | 500    |
| 40 | 134645260     | 500    | 90  | 134980986     | 500    |
| 41 | 134646985     | 500    | 91  | 134980934     | 500    |
| 42 | 134680278     | 500    | 92  | 134982174     | 500    |
| 43 | 134697196     | 500    | 93  | 134983369     | 500    |
| 44 | 134757284     | 500    | 94  | 134983852     | 500    |
| 45 | 134756340     | 500    | 95  | 134985543     | 500    |
| 46 | 134772301     | 500    | 96  | 134987004     | 500    |
| 47 | 134764481     | 500    | 97  | 134987205     | 500    |
| 48 | 134774089     | 500    | 98  | 134986572     | 500    |
| 49 | 134775945     | 500    | 99  | 134988987     | 500    |
| 50 | 134784801     | 500    | 100 | 134990235     | 500    |

**Table 7 Queries of length 1000 for env\_nr database**

| Id | Accession No. | Length | Id  | Accession No. | Length |
|----|---------------|--------|-----|---------------|--------|
| 1  | 142012494     | 1000   | 51  | 142429925     | 1002   |
| 2  | 142017512     | 1000   | 52  | 142591933     | 1002   |
| 3  | 142031891     | 1000   | 53  | 143069530     | 1002   |
| 4  | 142043207     | 1000   | 54  | 143094407     | 1002   |
| 5  | 142179393     | 1000   | 55  | 143733222     | 1002   |
| 6  | 142525661     | 1000   | 56  | 143846397     | 1002   |
| 7  | 143310744     | 1000   | 57  | 143923052     | 1002   |
| 8  | 143515314     | 1000   | 58  | 144150590     | 1002   |
| 9  | 144169629     | 1000   | 59  | 144161851     | 1002   |
| 10 | 144191973     | 1000   | 60  | 816619644     | 1002   |
| 11 | 816698252     | 1000   | 61  | 816619759     | 1002   |
| 12 | 816708527     | 1000   | 62  | 816619768     | 1002   |
| 13 | 816729788     | 1000   | 63  | 816619821     | 1002   |
| 14 | 816731198     | 1000   | 64  | 816676513     | 1002   |
| 15 | 816778245     | 1000   | 65  | 816691763     | 1002   |
| 16 | 816817300     | 1000   | 66  | 816732767     | 1002   |
| 17 | 816825841     | 1000   | 67  | 816748029     | 1002   |
| 18 | 816826335     | 1000   | 68  | 816766353     | 1002   |
| 19 | 816827186     | 1000   | 69  | 142041896     | 1003   |
| 20 | 816835438     | 1000   | 70  | 142022172     | 1003   |
| 21 | 142019881     | 1001   | 71  | 142128486     | 1003   |
| 22 | 142020170     | 1001   | 72  | 142176059     | 1003   |
| 23 | 142048127     | 1001   | 73  | 142205816     | 1003   |
| 24 | 142086845     | 1001   | 74  | 142410039     | 1003   |
| 25 | 142098518     | 1001   | 75  | 142579941     | 1003   |
| 26 | 142140154     | 1001   | 76  | 142719660     | 1003   |
| 27 | 142202352     | 1001   | 77  | 143064594     | 1003   |
| 28 | 142368108     | 1001   | 78  | 143165980     | 1003   |
| 29 | 142438858     | 1001   | 79  | 143272099     | 1003   |
| 30 | 142643052     | 1001   | 80  | 143359527     | 1003   |
| 31 | 143114614     | 1001   | 81  | 143999536     | 1003   |
| 32 | 143559679     | 1001   | 82  | 144025935     | 1003   |
| 33 | 143640519     | 1001   | 83  | 402664787     | 1003   |
| 34 | 143816529     | 1001   | 84  | 402688283     | 1003   |
| 35 | 144190845     | 1001   | 85  | 566276073     | 1003   |
| 36 | 531023574     | 1001   | 86  | 816746486     | 1003   |
| 37 | 816760727     | 1001   | 87  | 816751876     | 1003   |
| 38 | 816619581     | 1001   | 88  | 816767130     | 1003   |
| 39 | 816619651     | 1001   | 89  | 816826585     | 1003   |
| 40 | 816702035     | 1001   | 90  | 816838647     | 1003   |
| 41 | 816714166     | 1001   | 91  | 142553979     | 1004   |
| 42 | 816734703     | 1001   | 92  | 142835047     | 1004   |
| 43 | 816769934     | 1001   | 93  | 142901850     | 1004   |
| 44 | 816797340     | 1001   | 94  | 142947240     | 1004   |
| 45 | 816807776     | 1001   | 95  | 143163344     | 1004   |
| 46 | 816832670     | 1001   | 96  | 143207256     | 1004   |
| 47 | 142616658     | 1002   | 97  | 143341135     | 1004   |
| 48 | 142040802     | 1002   | 98  | 143569948     | 1004   |
| 49 | 142148851     | 1002   | 99  | 143878219     | 1004   |
| 50 | 142177040     | 1002   | 100 | 143880239     | 1004   |

**Table 8 Queries of mixed length for env\_nr database**

| Id | Accession No. | Length | Id  | Accession No. | Length |
|----|---------------|--------|-----|---------------|--------|
| 1  | 598854877     | 47     | 51  | 134977936     | 177    |
| 2  | 140705305     | 60     | 52  | 134902228     | 180    |
| 3  | 141204517     | 62     | 53  | 134840084     | 183    |
| 4  | 140928694     | 64     | 54  | 134931935     | 186    |
| 5  | 140516537     | 66     | 55  | 135146690     | 189    |
| 6  | 140187978     | 68     | 56  | 136236681     | 192    |
| 7  | 139809410     | 70     | 57  | 137725811     | 195    |
| 8  | 139787472     | 72     | 58  | 139055769     | 198    |
| 9  | 140157778     | 74     | 59  | 140937912     | 201    |
| 10 | 140554256     | 76     | 60  | 142789788     | 204    |
| 11 | 141162879     | 78     | 61  | 134328296     | 208    |
| 12 | 142139731     | 80     | 62  | 137470780     | 211    |
| 13 | 143765982     | 82     | 63  | 141219041     | 214    |
| 14 | 604359080     | 84     | 64  | 816827795     | 217    |
| 15 | 135069683     | 87     | 65  | 138064217     | 221    |
| 16 | 132721205     | 89     | 66  | 142290739     | 224    |
| 17 | 139226674     | 91     | 67  | 135809514     | 228    |
| 18 | 141944072     | 93     | 68  | 140636253     | 231    |
| 19 | 816589676     | 95     | 69  | 134503619     | 235    |
| 20 | 136362760     | 98     | 70  | 139199851     | 238    |
| 21 | 139820455     | 100    | 71  | 143745183     | 241    |
| 22 | 142999362     | 102    | 72  | 137104626     | 245    |
| 23 | 135371020     | 105    | 73  | 140666281     | 248    |
| 24 | 139433346     | 107    | 74  | 598811498     | 251    |
| 25 | 143500432     | 109    | 75  | 137544767     | 255    |
| 26 | 136171243     | 112    | 76  | 140268927     | 258    |
| 27 | 140754506     | 114    | 77  | 143281312     | 261    |
| 28 | 816806333     | 116    | 78  | 135586108     | 265    |
| 29 | 138723145     | 119    | 79  | 139261929     | 268    |
| 30 | 406549641     | 121    | 80  | 142862713     | 271    |
| 31 | 136970711     | 124    | 81  | 137510121     | 275    |
| 32 | 142136239     | 126    | 82  | 142964267     | 278    |
| 33 | 135832348     | 129    | 83  | 139382762     | 282    |
| 34 | 141122975     | 131    | 84  | 136983476     | 286    |
| 35 | 135318358     | 134    | 85  | 135993248     | 290    |
| 36 | 141440514     | 136    | 86  | 137156525     | 294    |
| 37 | 135626672     | 139    | 87  | 141034093     | 298    |
| 38 | 141244915     | 141    | 88  | 137946867     | 303    |
| 39 | 135867469     | 144    | 89  | 139744034     | 308    |
| 40 | 142399569     | 146    | 90  | 137480711     | 314    |
| 41 | 137330918     | 149    | 91  | 135710091     | 321    |
| 42 | 594906122     | 151    | 92  | 142101584     | 329    |
| 43 | 140340446     | 154    | 93  | 816751479     | 339    |
| 44 | 136581010     | 157    | 94  | 135741269     | 353    |
| 45 | 604368256     | 159    | 95  | 143931953     | 368    |
| 46 | 142111917     | 162    | 96  | 816479838     | 386    |
| 47 | 139559838     | 165    | 97  | 134938263     | 408    |
| 48 | 137785644     | 168    | 98  | 143120162     | 433    |
| 49 | 136171000     | 171    | 99  | 143359191     | 464    |
| 50 | 135545852     | 174    | 100 | 144048086     | 504    |

**Table 9** Queries of length 100 for nr database

| Id | Accession No. | Length | Id  | Accession No. | Length |
|----|---------------|--------|-----|---------------|--------|
| 1  | 489997053     | 100    | 51  | 446170608     | 100    |
| 2  | 446539296     | 100    | 52  | 489496644     | 100    |
| 3  | 446468074     | 100    | 53  | 488808069     | 100    |
| 4  | 489343522     | 100    | 54  | 446988304     | 100    |
| 5  | 492912358     | 100    | 55  | 446791743     | 100    |
| 6  | 489499370     | 100    | 56  | 489504421     | 100    |
| 7  | 446137644     | 100    | 57  | 489346798     | 100    |
| 8  | 447025259     | 100    | 58  | 446568220     | 100    |
| 9  | 489497985     | 100    | 59  | 640582099     | 100    |
| 10 | 489073531     | 100    | 60  | 647819422     | 100    |
| 11 | 489495023     | 100    | 61  | 757558705     | 100    |
| 12 | 21957602      | 100    | 62  | 675757412     | 100    |
| 13 | 446013587     | 100    | 63  | 740811767     | 100    |
| 14 | 446271781     | 100    | 64  | 696235350     | 100    |
| 15 | 489818951     | 100    | 65  | 749299286     | 100    |
| 16 | 500999192     | 100    | 66  | 749300134     | 100    |
| 17 | 446461512     | 100    | 67  | 495569794     | 100    |
| 18 | 446540196     | 100    | 68  | 497549406     | 100    |
| 19 | 489818227     | 100    | 69  | 4972469       | 100    |
| 20 | 446087516     | 100    | 70  | 23305332      | 100    |
| 21 | 489181190     | 100    | 71  | 3882083       | 100    |
| 22 | 489498671     | 100    | 72  | 14335669      | 100    |
| 23 | 489204031     | 100    | 73  | 24106626      | 100    |
| 24 | 489175209     | 100    | 74  | 15638199      | 100    |
| 25 | 489343763     | 100    | 75  | 3043899       | 100    |
| 26 | 488139160     | 100    | 76  | 10716959      | 100    |
| 27 | 488942295     | 100    | 77  | 19879520      | 100    |
| 28 | 488142215     | 100    | 78  | 545013        | 100    |
| 29 | 446946313     | 100    | 79  | 15638493      | 100    |
| 30 | 446294093     | 100    | 80  | 28912358      | 100    |
| 31 | 489073924     | 100    | 81  | 22202881      | 100    |
| 32 | 489817928     | 100    | 82  | 22074017      | 100    |
| 33 | 446346290     | 100    | 83  | 19913144      | 100    |
| 34 | 446010456     | 100    | 84  | 17046717      | 100    |
| 35 | 488139900     | 100    | 85  | 29075682      | 100    |
| 36 | 489997344     | 100    | 86  | 15638505      | 100    |
| 37 | 446540198     | 100    | 87  | 15637937      | 100    |
| 38 | 491883924     | 100    | 88  | 28912298      | 100    |
| 39 | 446941606     | 100    | 89  | 28912382      | 100    |
| 40 | 489348577     | 100    | 90  | 12843514      | 100    |
| 41 | 489513185     | 100    | 91  | 15236674      | 100    |
| 42 | 445993072     | 100    | 92  | 28912268      | 100    |
| 43 | 489818381     | 100    | 93  | 12053733      | 100    |
| 44 | 11289046      | 100    | 94  | 18766230      | 100    |
| 45 | 488941687     | 100    | 95  | 5732209       | 100    |
| 46 | 447088107     | 100    | 96  | 300183        | 100    |
| 47 | 488144080     | 100    | 97  | 21628589      | 100    |
| 48 | 16416092      | 100    | 98  | 12855637      | 100    |
| 49 | 488941971     | 100    | 99  | 21954492      | 100    |
| 50 | 446625687     | 100    | 100 | 23598397      | 100    |

**Table 10** Queries of length 500 for nr database

| Id | Accession No. | Length | Id  | Accession No. | Length |
|----|---------------|--------|-----|---------------|--------|
| 1  | 446136634     | 500    | 51  | 28950355      | 500    |
| 2  | 488940392     | 500    | 52  | 488150223     | 500    |
| 3  | 698982736     | 500    | 53  | 26334977      | 500    |
| 4  | 67469651      | 500    | 54  | 22477134      | 500    |
| 5  | 446111600     | 500    | 55  | 5734766       | 500    |
| 6  | 446377181     | 500    | 56  | 40316944      | 500    |
| 7  | 489497220     | 500    | 57  | 8163672       | 500    |
| 8  | 85110235      | 500    | 58  | 13508485      | 500    |
| 9  | 481023599     | 500    | 59  | 55622         | 500    |
| 10 | 446073879     | 500    | 60  | 124808622     | 500    |
| 11 | 526769928     | 500    | 61  | 7321134       | 500    |
| 12 | 526765571     | 500    | 62  | 17538500      | 500    |
| 13 | 694132388     | 500    | 63  | 446897307     | 500    |
| 14 | 696335236     | 500    | 64  | 6002620       | 500    |
| 15 | 740672164     | 500    | 65  | 4210322       | 500    |
| 16 | 686875550     | 500    | 66  | 23986207      | 500    |
| 17 | 686961337     | 500    | 67  | 29608200      | 500    |
| 18 | 495567824     | 500    | 68  | 10443291      | 500    |
| 19 | 495568938     | 500    | 69  | 14582421      | 500    |
| 20 | 17862970      | 500    | 70  | 254750635     | 500    |
| 21 | 148747522     | 500    | 71  | 17561336      | 500    |
| 22 | 9857716       | 500    | 72  | 1835208       | 500    |
| 23 | 18463969      | 500    | 73  | 29119276      | 500    |
| 24 | 28278907      | 500    | 74  | 21493015      | 500    |
| 25 | 21039040      | 500    | 75  | 1930065       | 500    |
| 26 | 29119286      | 500    | 76  | 14582441      | 500    |
| 27 | 26340652      | 500    | 77  | 27348214      | 500    |
| 28 | 499291684     | 500    | 78  | 32564943      | 500    |
| 29 | 18766383      | 500    | 79  | 15011369      | 500    |
| 30 | 21954316      | 500    | 80  | 29119693      | 500    |
| 31 | 14582429      | 500    | 81  | 20453805      | 500    |
| 32 | 7260620       | 500    | 82  | 1405817       | 500    |
| 33 | 446637732     | 500    | 83  | 23986221      | 500    |
| 34 | 22749021      | 500    | 84  | 32566151      | 500    |
| 35 | 29119677      | 500    | 85  | 9844871       | 500    |
| 36 | 5262157       | 500    | 86  | 32564038      | 500    |
| 37 | 21618274      | 500    | 87  | 575771805     | 500    |
| 38 | 19112286      | 500    | 88  | 14326568      | 500    |
| 39 | 75315260      | 500    | 89  | 3308978       | 500    |
| 40 | 496913        | 500    | 90  | 14582427      | 500    |
| 41 | 18491105      | 500    | 91  | 499365837     | 500    |
| 42 | 15991439      | 500    | 92  | 157869052     | 500    |
| 43 | 60193         | 500    | 93  | 18033652      | 500    |
| 44 | 29367581      | 500    | 94  | 29119691      | 500    |
| 45 | 28972954      | 500    | 95  | 4205009       | 500    |
| 46 | 12852969      | 500    | 96  | 950611        | 500    |
| 47 | 28875420      | 500    | 97  | 4205036       | 500    |
| 48 | 262263427     | 500    | 98  | 15011862      | 500    |
| 49 | 9105725       | 500    | 99  | 19912245      | 500    |
| 50 | 71274109      | 500    | 100 | 14537785      | 500    |

**Table 11** Queries of length 1000 for nr database

| Id | Accession No. | Length | Id  | Accession No. | Length |
|----|---------------|--------|-----|---------------|--------|
| 1  | 688557372     | 1000   | 51  | 55139253      | 1000   |
| 2  | 27369652      | 1000   | 52  | 55168116      | 1000   |
| 3  | 14571749      | 1000   | 53  | 55726687      | 1000   |
| 4  | 22328898      | 1000   | 54  | 57530344      | 1000   |
| 5  | 21429096      | 1000   | 55  | 57869675      | 1000   |
| 6  | 4324748       | 1000   | 56  | 57869609      | 1000   |
| 7  | 240256190     | 1000   | 57  | 57899335      | 1000   |
| 8  | 124809435     | 1000   | 58  | 60360186      | 1000   |
| 9  | 124511784     | 1000   | 59  | 72387880      | 1000   |
| 10 | 15281471      | 1000   | 60  | 63098401      | 1000   |
| 11 | 5923681       | 1000   | 61  | 67553112      | 1000   |
| 12 | 4324739       | 1000   | 62  | 68062740      | 1000   |
| 13 | 22596379      | 1000   | 63  | 500101586     | 1000   |
| 14 | 436062        | 1000   | 64  | 494438949     | 1000   |
| 15 | 19075266      | 1000   | 65  | 500937396     | 1000   |
| 16 | 17533605      | 1000   | 66  | 500936235     | 1000   |
| 17 | 930252        | 1000   | 67  | 90812163      | 1000   |
| 18 | 22596309      | 1000   | 68  | 269316050     | 1000   |
| 19 | 17046663      | 1000   | 69  | 504836388     | 1000   |
| 20 | 22596515      | 1000   | 70  | 91200761      | 1000   |
| 21 | 29789203      | 1000   | 71  | 500600676     | 1000   |
| 22 | 24181509      | 1000   | 72  | 91089169      | 1000   |
| 23 | 19112190      | 1000   | 73  | 642933751     | 1000   |
| 24 | 21064719      | 1000   | 74  | 63014448      | 1000   |
| 25 | 499789111     | 1000   | 75  | 63014478      | 1000   |
| 26 | 568952968     | 1000   | 76  | 63014557      | 1000   |
| 27 | 32398993      | 1000   | 77  | 93354961      | 1000   |
| 28 | 39545749      | 1000   | 78  | 499846011     | 1000   |
| 29 | 33324437      | 1000   | 79  | 499853393     | 1000   |
| 30 | 922982901     | 1000   | 80  | 500591839     | 1000   |
| 31 | 37677875      | 1000   | 81  | 108862582     | 1000   |
| 32 | 37682421      | 1000   | 82  | 157133489     | 1000   |
| 33 | 37682471      | 1000   | 83  | 157133543     | 1000   |
| 34 | 37682589      | 1000   | 84  | 157113879     | 1000   |
| 35 | 37682791      | 1000   | 85  | 157136795     | 1000   |
| 36 | 37682510      | 1000   | 86  | 157120758     | 1000   |
| 37 | 389627648     | 1000   | 87  | 109090759     | 1000   |
| 38 | 38201798      | 1000   | 88  | 499887212     | 1000   |
| 39 | 1002292640    | 1000   | 89  | 500130697     | 1000   |
| 40 | 38892737      | 1000   | 90  | 145334361     | 1000   |
| 41 | 38892717      | 1000   | 91  | 111278795     | 1000   |
| 42 | 39777425      | 1000   | 92  | 112351529     | 1000   |
| 43 | 162287071     | 1000   | 93  | 113536096     | 1000   |
| 44 | 162138878     | 1000   | 94  | 1002307818    | 1000   |
| 45 | 148228726     | 1000   | 95  | 501243259     | 1000   |
| 46 | 1002269842    | 1000   | 96  | 501243094     | 1000   |
| 47 | 50312247      | 1000   | 97  | 115385747     | 1000   |
| 48 | 51860718      | 1000   | 98  | 115388543     | 1000   |
| 49 | 52626660      | 1000   | 99  | 115396338     | 1000   |
| 50 | 54650550      | 1000   | 100 | 114208152     | 1000   |

**Table 12** Queries of mixed length for nr database

| Id | Accession No. | Length | Id  | Accession No. | Length |
|----|---------------|--------|-----|---------------|--------|
| 1  | 172072923     | 36     | 51  | 447111697     | 266    |
| 2  | 123964378     | 45     | 52  | 499767562     | 272    |
| 3  | 500811446     | 53     | 53  | 126325233     | 277    |
| 4  | 225785182     | 59     | 54  | 488313363     | 282    |
| 5  | 499467514     | 66     | 55  | 308810743     | 288    |
| 6  | 501552363     | 71     | 56  | 490745207     | 293    |
| 7  | 47059802      | 77     | 57  | 19684076      | 299    |
| 8  | 116067465     | 82     | 58  | 499879507     | 304    |
| 9  | 500839838     | 87     | 59  | 501120649     | 309    |
| 10 | 45593572      | 92     | 60  | 182636592     | 314    |
| 11 | 116275093     | 96     | 61  | 501046907     | 320    |
| 12 | 25986587      | 100    | 62  | 15242422      | 326    |
| 13 | 446409273     | 103    | 63  | 500480960     | 331    |
| 14 | 500931742     | 108    | 64  | 501328107     | 336    |
| 15 | 119447232     | 112    | 65  | 493847041     | 342    |
| 16 | 500027729     | 116    | 66  | 17562806      | 347    |
| 17 | 123185167     | 120    | 67  | 491518789     | 353    |
| 18 | 159113091     | 124    | 68  | 255920993     | 359    |
| 19 | 489451443     | 128    | 69  | 490659403     | 366    |
| 20 | 177841999     | 132    | 70  | 494504675     | 374    |
| 21 | 157937293     | 136    | 71  | 62131566      | 380    |
| 22 | 158703990     | 140    | 72  | 110004598     | 387    |
| 23 | 171687845     | 144    | 73  | 446784915     | 394    |
| 24 | 5002110314    | 148    | 74  | 13736608      | 402    |
| 25 | 169154312     | 152    | 75  | 502299591     | 407    |
| 26 | 227204453     | 156    | 76  | 68300914      | 416    |
| 27 | 502646068     | 160    | 77  | 159491114     | 424    |
| 28 | 22036969      | 165    | 78  | 488693593     | 433    |
| 29 | 159031824     | 169    | 79  | 159111142     | 441    |
| 30 | 30267426      | 174    | 80  | 122956524     | 450    |
| 31 | 501188556     | 178    | 81  | 501214405     | 459    |
| 32 | 13924699      | 183    | 82  | 9663376       | 469    |
| 33 | 113529383     | 187    | 83  | 168203408     | 478    |
| 34 | 118025876     | 191    | 84  | 499852914     | 490    |
| 35 | 501240156     | 195    | 85  | 115492641     | 500    |
| 36 | 12657538      | 200    | 86  | 488242634     | 511    |
| 37 | 164597809     | 203    | 87  | 73853844      | 526    |
| 38 | 157929914     | 207    | 88  | 32479362      | 543    |
| 39 | 169819301     | 211    | 89  | 161377395     | 560    |
| 40 | 160917414     | 215    | 90  | 495078156     | 579    |
| 41 | 491993844     | 219    | 91  | 31127293      | 602    |
| 42 | 148566579     | 224    | 92  | 6522932       | 628    |
| 43 | 499922921     | 228    | 93  | 168049721     | 657    |
| 44 | 494373060     | 232    | 94  | 501130444     | 691    |
| 45 | 157082702     | 237    | 95  | 501642054     | 727    |
| 46 | 487814322     | 242    | 96  | 168024665     | 770    |
| 47 | 119708113     | 247    | 97  | 501445105     | 828    |
| 48 | 527104126     | 252    | 98  | 157836309     | 886    |
| 49 | 501987047     | 256    | 99  | 497563010     | 982    |
| 50 | 502141206     | 261    | 100 | 500116876     | 1127   |
